# Supplementary material
Source: ML conference proceedings conference paper supplement (https://openaccess.thecvf.com/content/WACV2023/html/Robbins_CAST_Conditional_Attribute_WACV_2023_paper.html)
Supplement: Supplementary file 1 [file Robbins_CAST_Conditional_Attribute_WACV_2023_supplemental.pdf]

# CAST: Conditional Attribute Subsampling Toolkit for Fine-grained Evaluation

## Supplementary Material

Wes Robbins<sup>\*†1</sup>      Steven Zhou<sup>\*†1</sup>      Aman Bhatta<sup>†2</sup>      Chad Mello<sup>†1</sup>  
Vitor Albiero<sup>†2</sup>      Kevin W. Bowyer<sup>†2</sup>      Terrance E. Boult<sup>†1</sup>

<sup>1</sup>University of Colorado, Colorado Springs

<sup>2</sup>University of Notre Dame

{wrobbins,szhou,cmello}@uccs.edu, tboult@vast.uccs.edu, {abhatta, valbiero, kwb}@nd.edu

### Supplementary Overview

In Section 0.1, psuedo-code is provided for the generation of the CAST-11 (C11) benchmark, which was introduced in Section 4.4 of the main paper. In Section 0.2, attribute correlation heatmap matrices are provided for attributes calculated over WebFace42M. A complete table of attriute Pearson correlations is provided after the matrices.

---

<sup>\*</sup>Co-first Author

<sup>†</sup>This research is based upon work supported in part by the Office of the Director of National Intelligence (ODNI), Intelligence Advanced Research Projects Activity (IARPA), via [2022-21102100003]. The views and conclusions contained herein are those of the authors and should not be interpreted as necessarily representing the official policies, either expressed or implied, of ODNI, IARPA, or the U.S. Government. The U.S. Government is authorized to reproduce and distribute reprints for governmental purposes notwithstanding any copyright annotation therein.

## 0.1. C11 Benchmark Generation

The following is pseudo code for the hard-pair mining in the C11 benchmark.

---

### Algorithm 1: Psuedo-code for generation of CC11 Benchmark

---

```

 $\mathcal{D} \leftarrow \text{Webface42M} \setminus \text{WebFace12M};$ 
 $\mathcal{F} \leftarrow \text{RESNET100};$ 
 $\mathcal{A} \leftarrow \{a_1..a_{11}\};$  /* attributes each sub-benchmark */
 $\mathcal{T} \leftarrow \{(t_1^+, t_1^-)..(t_{11}^+, t_{11}^-)\};$  /* upper lower quartile per attribute */
 $IP \leftarrow \{IP_1 \leftarrow \emptyset..IP_{11} \leftarrow \emptyset\};$  /* init per attribute impostor pairs set */
 $GP \leftarrow \{GP_1 \leftarrow \emptyset..GP_{11} \leftarrow \emptyset\};$  /* init per attribute genuine pairs set */
 $\gamma_- \leftarrow 0.15;$ 
 $\gamma_+ \leftarrow 0.30;$ 
for  $i \leftarrow 0$  to 11 do
     $\mathcal{D}_i \leftarrow \text{CAST\_FILTER}(\mathcal{D}, a_i, t_i^-, t_i^+);$ 
    while  $\|GP_i\| < 5000$  do
         $s_1, s_2 \leftarrow \text{random unseen matching pair};$ 
         $x_1, x_2 \leftarrow \mathcal{F}(s_1), \mathcal{F}(s_2);$ 
         $d \leftarrow \frac{x_1 \cdot x_2}{\|x_1\| \|x_2\|}$ 
        if  $\gamma_- \leq d \leq \gamma_+$  then
             $GP_i \leftarrow GP_i \cup \{(s_1, s_2)\}$ 
        else
            end
        while  $\|IP_i\| < 5000$  do
             $s_1, s_2 \leftarrow \text{random unseen non-matching pair};$ 
             $x_1, x_2 \leftarrow \mathcal{F}(s_1), \mathcal{F}(s_2);$ 
             $d \leftarrow \frac{x_1 \cdot x_2}{\|x_1\| \|x_2\|}$ 
            if  $\gamma_- \leq d \leq \gamma_+$  then
                 $IP_i \leftarrow IP_i \cup \{(s_1, s_2)\}$ 
            else
                end
            end
        end
    end
end

```

---

## 0.2. Mild to Significant Attribute Correlations

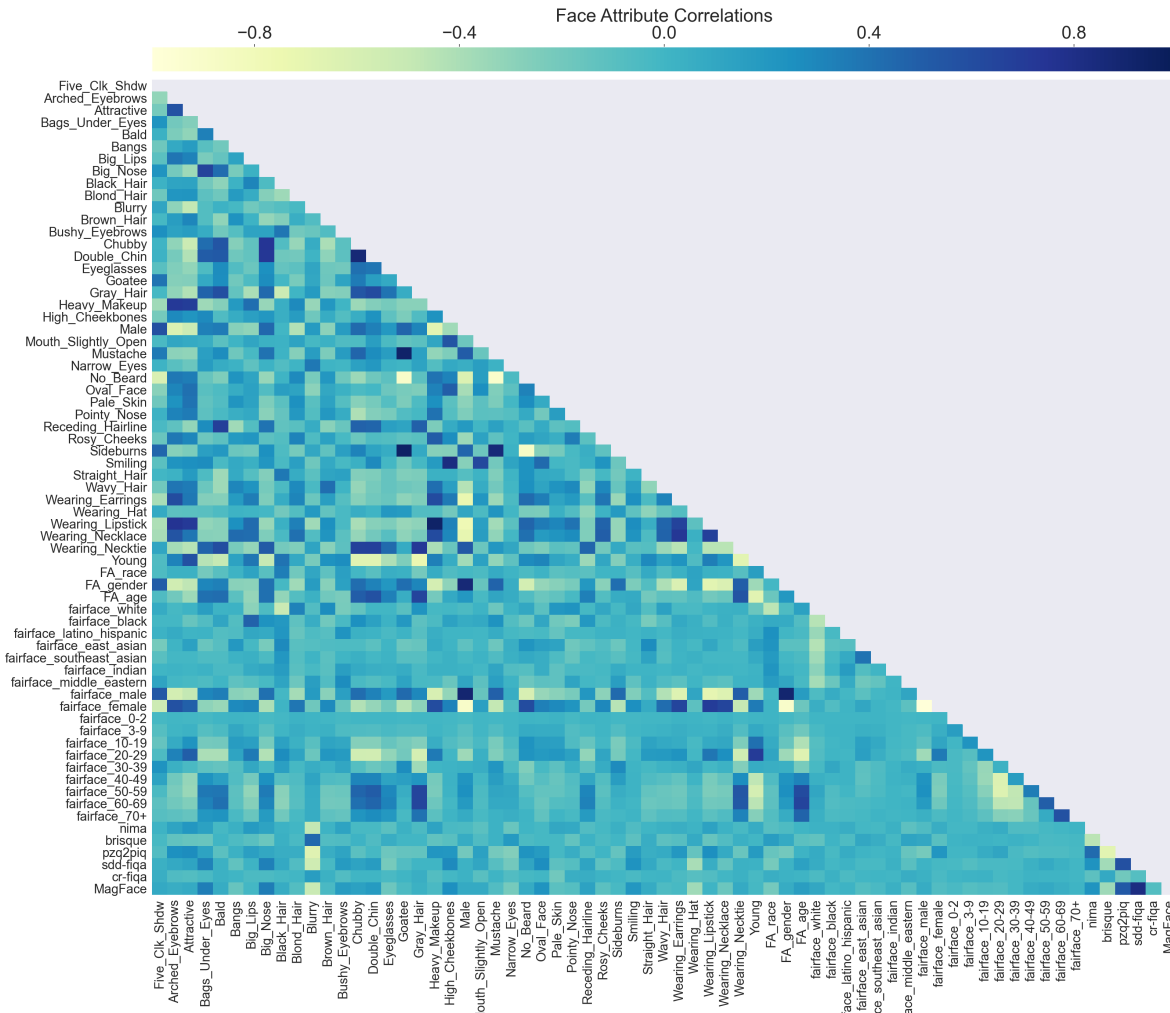

Figure 1. Full heat map depicting correlations across all attributes. Note that our quality metrics are all ascending except for *brisque*, which is descending (lower-is-better); as a result, it has negative correlation with the others. Please refer to Section 4.2 in main paper for details on attribute computations.

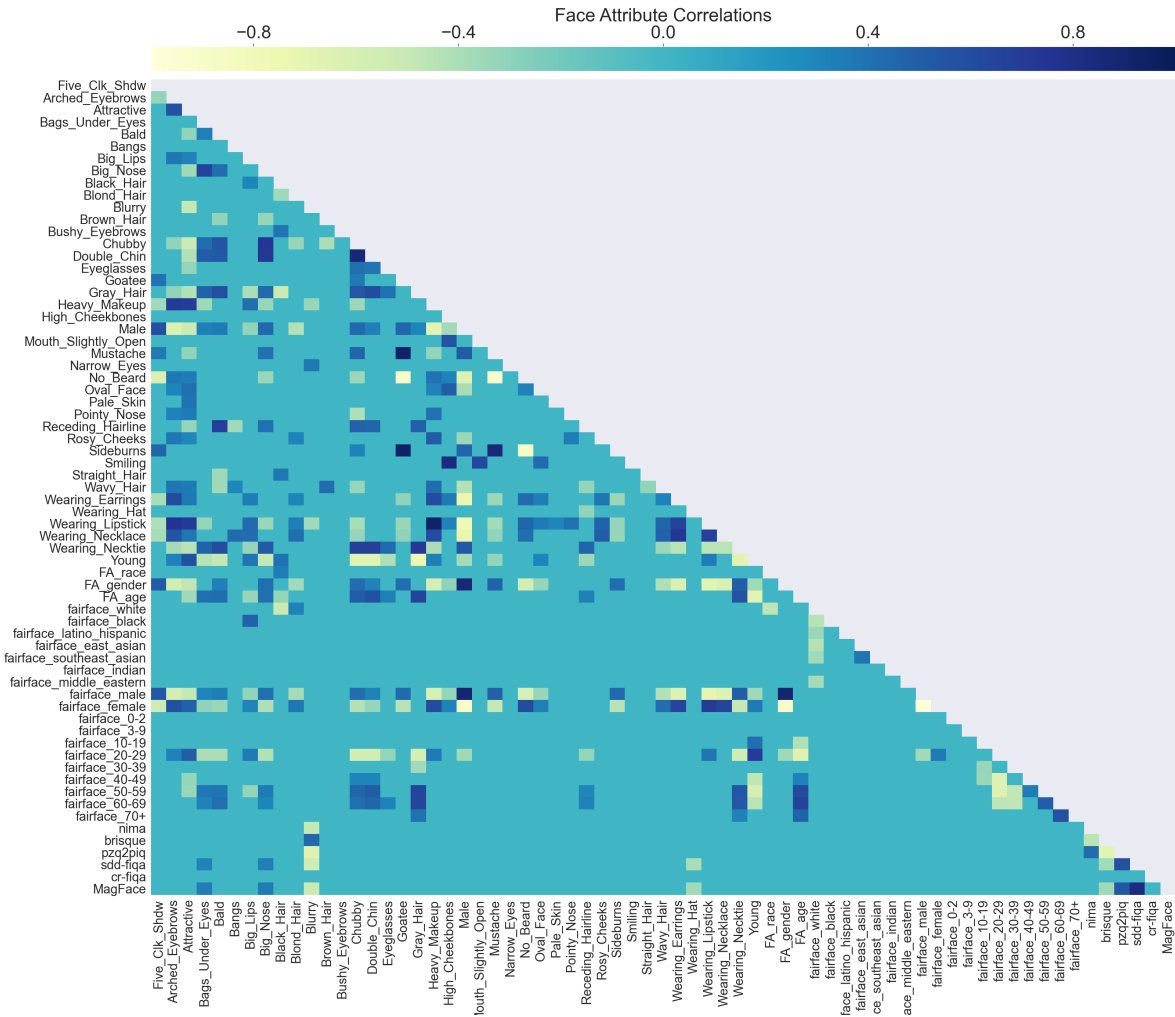

Figure 2. Heat map depicting moderate to strong correlations ( $p \geq \text{abs}(0.30)$ ) as listed in table 1. Weak associations were set to zero for readability.

Table 1: Attribute Correlation Coefficients

| Attribute Pair   |                  | $p$    |
|------------------|------------------|--------|
| Mustache         | No_Beard         | -0.910 |
| FA_gender        | fairface_female  | -0.905 |
| Male             | fairface_female  | -0.898 |
| No_Beard         | Goatee           | -0.892 |
| No_Beard         | Sideburns        | -0.878 |
| Wearing_Lipstick | Male             | -0.769 |
| Young            | Gray_Hair        | -0.741 |
| Wearing_Earrings | Male             | -0.728 |
| Wearing_Necklace | Male             | -0.704 |
| Wearing_Lipstick | fairface_male    | -0.697 |
| pzq2piq          | brisque          | -0.677 |
| Heavy_Makeup     | Male             | -0.675 |
| Wearing_Lipstick | FA_gender        | -0.672 |
| Young            | Wearing_Necktie  | -0.672 |
| FA_age           | Young            | -0.671 |
| Double_Chin      | Young            | -0.661 |
| Chubby           | Young            | -0.660 |
| fairface_20-29   | FA_age           | -0.655 |
| pzq2piq          | Blurry           | -0.651 |
| fairface_male    | Wearing_Necklace | -0.647 |
| Wearing_Earrings | fairface_male    | -0.644 |
| fairface_50-59   | fairface_20-29   | -0.642 |
| fairface_20-29   | fairface_40-49   | -0.638 |
| Male             | Arched_Eyebrows  | -0.631 |
| Wearing_Earrings | FA_gender        | -0.623 |
| No_Beard         | Five_Clk_Shdw    | -0.623 |
| Wearing_Necklace | FA_gender        | -0.621 |
| fairface_male    | Heavy_Makeup     | -0.605 |
| No_Beard         | fairface_male    | -0.602 |
| Gray_Hair        | fairface_20-29   | -0.591 |
| Young            | fairface_50-59   | -0.582 |
| FA_gender        | Heavy_Makeup     | -0.580 |
| FA_gender        | No_Beard         | -0.578 |
| Arched_Eyebrows  | fairface_male    | -0.573 |
| Double_Chin      | fairface_20-29   | -0.564 |
| Chubby           | fairface_20-29   | -0.561 |

Continued on next column/page...

Table 1: Attribute Correlation Coefficients (Continued)

| Attribute Pair   |                     | $p$    |
|------------------|---------------------|--------|
| FA_gender        | Arched_Eyebrows     | -0.557 |
| Wearing_Necktie  | fairface_20-29      | -0.554 |
| Blurry           | sdd-fiqa            | -0.552 |
| Five_Clk_Shdw    | fairface_female     | -0.537 |
| Attractive       | Chubby              | -0.531 |
| Attractive       | Male                | -0.529 |
| Black_Hair       | Gray_Hair           | -0.528 |
| MagFace          | Blurry              | -0.520 |
| fairface_white   | Black_Hair          | -0.516 |
| Wearing_Necktie  | fairface_female     | -0.500 |
| Bald             | Young               | -0.498 |
| Young            | Big_Nose            | -0.498 |
| Blurry           | Attractive          | -0.491 |
| fairface_male    | Attractive          | -0.490 |
| fairface_female  | Mustache            | -0.488 |
| nima             | Blurry              | -0.486 |
| fairface_50-59   | fairface_30-39      | -0.482 |
| FA_gender        | Attractive          | -0.475 |
| fairface_30-39   | fairface_60-69      | -0.471 |
| fairface_40-49   | Young               | -0.469 |
| fairface_20-29   | fairface_60-69      | -0.465 |
| FA_race          | fairface_white      | -0.462 |
| fairface_60-69   | Young               | -0.460 |
| nima             | brisque             | -0.459 |
| Wearing_Necktie  | Wearing_Earrings    | -0.450 |
| Wearing_Necktie  | Wearing_Necklace    | -0.449 |
| Wearing_Lipstick | Wearing_Necktie     | -0.448 |
| Bags_Under_Eyes  | Young               | -0.443 |
| Wearing_Necktie  | Attractive          | -0.440 |
| fairface_female  | Goatee              | -0.440 |
| fairface_black   | fairface_white      | -0.440 |
| Sideburns        | fairface_female     | -0.440 |
| fairface_white   | fairface_east_asian | -0.433 |
| Male             | Wavy_Hair           | -0.432 |
| Male             | Blond_Hair          | -0.429 |

Continued on next column/page...

Table 1: Attribute Correlation Coefficients (Continued)

| Attribute Pair    |                          | $p$    |
|-------------------|--------------------------|--------|
| Chubby            | fairface_female          | -0.429 |
| Attractive        | Double_Chin              | -0.428 |
| Gray_Hair         | Attractive               | -0.427 |
| Big_Nose          | fairface_20-29           | -0.426 |
| Wavy_Hair         | fairface_male            | -0.425 |
| FA_age            | fairface_10-19           | -0.415 |
| Wearing_Lipstick  | Five_Clk_Shdw            | -0.412 |
| Eyeglasses        | Young                    | -0.412 |
| Wavy_Hair         | FA_gender                | -0.409 |
| Big_Nose          | fairface_female          | -0.407 |
| Chubby            | Brown_Hair               | -0.405 |
| fairface_20-29    | Bald                     | -0.404 |
| Big_Lips          | Gray_Hair                | -0.404 |
| Bags_Under_Eyes   | fairface_20-29           | -0.403 |
| Wearing_Necktie   | Heavy_Makeup             | -0.401 |
| Five_Clk_Shdw     | Wearing_Earrings         | -0.397 |
| Chubby            | Wearing_Lipstick         | -0.393 |
| Wearing_Hat       | sdd-fiqa                 | -0.392 |
| Five_Clk_Shdw     | Wearing_Necklace         | -0.386 |
| Male              | Oval_Face                | -0.385 |
| Wearing_Necktie   | Arched_Eyebrows          | -0.382 |
| fairface_white    | fairface_middle_eastern  | -0.376 |
| fairface_male     | Blond_Hair               | -0.376 |
| sdd-fiqa          | brisque                  | -0.375 |
| Wearing_Lipstick  | Mustache                 | -0.373 |
| Young             | Male                     | -0.371 |
| Receding_Hairline | Bangs                    | -0.365 |
| MagFace           | Wearing_Hat              | -0.363 |
| Gray_Hair         | fairface_30-39           | -0.363 |
| fairface_white    | fairface_southeast_asian | -0.362 |
| Five_Clk_Shdw     | Heavy_Makeup             | -0.362 |
| fairface_male     | fairface_20-29           | -0.362 |
| Male              | High_Cheekbones          | -0.362 |
| Blond_Hair        | FA_gender                | -0.361 |
| Blurry            | Wearing_Lipstick         | -0.360 |

Continued on next column/page...

Table 1: Attribute Correlation Coefficients (Continued)

| Attribute Pair    |                          | $p$    |
|-------------------|--------------------------|--------|
| Young             | FA_gender                | -0.359 |
| Bald              | Wavy_Hair                | -0.357 |
| Big_Nose          | Attractive               | -0.356 |
| Bags_Under_Eyes   | Heavy_Makeupe            | -0.356 |
| Young             | fairface_male            | -0.356 |
| Attractive        | FA_age                   | -0.355 |
| Black_Hair        | Blond_Hair               | -0.354 |
| fairface_20-29    | Male                     | -0.354 |
| brisque           | MagFace                  | -0.354 |
| fairface_20-29    | FA_gender                | -0.353 |
| Straight_Hair     | Bald                     | -0.352 |
| No_Beard          | Chubby                   | -0.351 |
| Wearing_Necktie   | Wavy_Hair                | -0.351 |
| Chubby            | Heavy_Makeup             | -0.351 |
| Receding_Hairline | Young                    | -0.351 |
| Wearing_Earrings  | Mustache                 | -0.347 |
| Rosy_Cheeks       | Male                     | -0.346 |
| fairface_white    | fairface_latino_hispanic | -0.343 |
| fairface_40-49    | fairface_10-19           | -0.342 |
| Attractive        | fairface_50-59           | -0.341 |
| fairface_female   | Bald                     | -0.340 |
| Big_Nose          | Wearing_Lipstick         | -0.338 |
| Sideburns         | Wearing_Earrings         | -0.336 |
| Blurry            | Heavy_Makeup             | -0.334 |
| Blond_Hair        | Chubby                   | -0.333 |
| Wearing_Lipstick  | Goatee                   | -0.331 |
| Big_Nose          | No_Beard                 | -0.331 |
| Heavy_Makeup      | Big_Nose                 | -0.330 |
| fairface_male     | Oval_Face                | -0.329 |
| fairface_30-39    | fairface_10-19           | -0.329 |
| Attractive        | fairface_40-49           | -0.328 |
| Wearing_Lipstick  | Sideburns                | -0.327 |
| Sideburns         | Wearing_Necklace         | -0.326 |
| Wearing_Necklace  | Chubby                   | -0.326 |
| Big_Lips          | Wearing_Necktie          | -0.325 |

Continued on next column/page...

Table 1: Attribute Correlation Coefficients (Continued)

| Attribute Pair    |                   | <i>p</i> |
|-------------------|-------------------|----------|
| Chubby            | Wavy_Hair         | -0.324   |
| FA_age            | Big_Lips          | -0.324   |
| FA_gender         | Oval_Face         | -0.323   |
| fairface_female   | Double_Chin       | -0.322   |
| Big_Nose          | Brown_Hair        | -0.321   |
| fairface_50-59    | Big_Lips          | -0.319   |
| Bags_Under_Eyes   | Wearing_Lipstick  | -0.318   |
| Young             | Mustache          | -0.317   |
| High_Cheekbones   | fairface_male     | -0.316   |
| Attractive        | Receding_Hairline | -0.315   |
| Eyeglasses        | Attractive        | -0.314   |
| Mustache          | Heavy_Makeup      | -0.314   |
| FA_age            | Black_Hair        | -0.314   |
| fairface_20-29    | Eyeglasses        | -0.314   |
| Five_Clk_Shdw     | Arched_Eyebrows   | -0.314   |
| Receding_Hairline | fairface_20-29    | -0.314   |
| Receding_Hairline | Wavy_Hair         | -0.314   |
| Mustache          | Wearing_Necklace  | -0.312   |
| Attractive        | Bald              | -0.312   |
| Brown_Hair        | Bald              | -0.312   |
| Receding_Hairline | Wearing_Hat       | -0.310   |
| Big_Lips          | Male              | -0.308   |
| Arched_Eyebrows   | Chubby            | -0.308   |
| Mustache          | Attractive        | -0.308   |
| Arched_Eyebrows   | Gray_Hair         | -0.307   |
| Wavy_Hair         | Straight_Hair     | -0.306   |
| fairface_male     | Big_Lips          | -0.306   |
| Bags_Under_Eyes   | fairface_female   | -0.303   |
| High_Cheekbones   | FA_gender         | -0.303   |
| Wearing_Necklace  | Goatee            | -0.303   |
| Goatee            | Wearing_Earrings  | -0.302   |
| Wearing_Lipstick  | Gray_Hair         | -0.300   |
| Bags_Under_Eyes   | FA_gender         | 0.300    |
| Wearing_Lipstick  | Pale_Skin         | 0.301    |
| Bangs             | Wavy_Hair         | 0.301    |

Continued on next column/page...

Table 1: Attribute Correlation Coefficients (Continued)

| Attribute Pair   |                   | <i>p</i> |
|------------------|-------------------|----------|
| fairface_50-59   | Receding_Hairline | 0.302    |
| Attractive       | Rosy_Cheeks       | 0.303    |
| fairface_male    | Bags_Under_Eyes   | 0.303    |
| Double_Chin      | fairface_40-49    | 0.305    |
| fairface_female  | Big_Lips          | 0.306    |
| Gray_Hair        | Male              | 0.307    |
| Young            | Oval_Face         | 0.307    |
| Black_Hair       | Big_Lips          | 0.307    |
| Blond_Hair       | Wearing_Earrings  | 0.308    |
| Oval_Face        | Arched_Eyebrows   | 0.308    |
| Big_Nose         | fairface_60-69    | 0.308    |
| fairface_40-49   | Chubby            | 0.312    |
| Arched_Eyebrows  | Pointy_Nose       | 0.313    |
| Chubby           | Sideburns         | 0.313    |
| Eyeglasses       | fairface_60-69    | 0.313    |
| Rosy_Cheeks      | Blond_Hair        | 0.314    |
| No_Beard         | High_Cheekbones   | 0.315    |
| Wearing_Necktie  | fairface_70+      | 0.315    |
| FA_age           | fairface_40-49    | 0.315    |
| fairface_female  | High_Cheekbones   | 0.316    |
| Young            | Arched_Eyebrows   | 0.317    |
| Wearing_Earrings | Wavy_Hair         | 0.318    |
| High_Cheekbones  | Wearing_Lipstick  | 0.321    |
| Oval_Face        | No_Beard          | 0.321    |
| fairface_male    | Double_Chin       | 0.322    |
| Attractive       | Big_Lips          | 0.322    |
| Bags_Under_Eyes  | sdd-fiqa          | 0.323    |
| Heavy_Makeup     | Oval_Face         | 0.323    |
| Double_Chin      | FA_gender         | 0.324    |
| Blond_Hair       | fairface.white    | 0.324    |
| fairface_20-29   | Arched_Eyebrows   | 0.325    |
| fairface_60-69   | Receding_Hairline | 0.326    |
| fairface_60-69   | Bags_Under_Eyes   | 0.326    |
| fairface_female  | Oval_Face         | 0.329    |
| Male             | Bags_Under_Eyes   | 0.329    |

Continued on next column/page...

Table 1: Attribute Correlation Coefficients (Continued)

| Attribute Pair    |                  | $p$   |
|-------------------|------------------|-------|
| Receding_Hairline | FA_age           | 0.329 |
| Wearing_Lipstick  | Blond_Hair       | 0.331 |
| Big_Nose          | sdd-fqqa         | 0.331 |
| Bald              | Bags_Under_Eyes  | 0.331 |
| FA_age            | Eyeglasses       | 0.332 |
| Bald              | FA_gender        | 0.334 |
| Young             | Heavy_Makeup     | 0.334 |
| Male              | Double_Chin      | 0.335 |
| Oval_Face         | Wearing_Earrings | 0.338 |
| MagFace           | Bags_Under_Eyes  | 0.338 |
| fairface_male     | Bald             | 0.340 |
| FA_race           | Black_Hair       | 0.341 |
| Young             | Wearing_Lipstick | 0.342 |
| Wearing_Earrings  | Big_Lips         | 0.344 |
| Rosy_Cheeks       | Pointy_Nose      | 0.348 |
| Attractive        | No_Beard         | 0.349 |
| fairface_50-59    | fairface_40-49   | 0.350 |
| MagFace           | Big_Nose         | 0.351 |
| Bald              | Male             | 0.352 |
| Wearing_Lipstick  | Oval_Face        | 0.352 |
| Attractive        | Wavy_Hair        | 0.353 |
| Big_Nose          | fairface_50-59   | 0.354 |
| Chubby            | Goatee           | 0.354 |
| Young             | fairface_female  | 0.356 |
| Attractive        | Pointy_Nose      | 0.358 |
| fairface_20-29    | fairface_female  | 0.362 |
| Five_Clk_Shdw     | Mustache         | 0.363 |
| fairface_20-29    | Heavy_Makeup     | 0.363 |
| Big_Lips          | fairface_20-29   | 0.365 |
| Wearing_Earrings  | High_Cheekbones  | 0.367 |
| Attractive        | Wearing_Earrings | 0.368 |
| Straight_Hair     | Black_Hair       | 0.369 |
| Arched_Eyebrows   | Rosy_Cheeks      | 0.370 |
| Blurry            | Narrow_Eyes      | 0.371 |
| Bags_Under_Eyes   | fairface_50-59   | 0.371 |

Continued on next column/page...

Table 1: Attribute Correlation Coefficients (Continued)

| Attribute Pair      |                          | $p$   |
|---------------------|--------------------------|-------|
| Arched_Eyebrows     | No_Beard                 | 0.371 |
| fairface_female     | Blond_Hair               | 0.376 |
| Young               | Big_Lips                 | 0.376 |
| Bald                | fairface_50-59           | 0.376 |
| Wearing_Lipstickr   | fairface_20-29           | 0.376 |
| Wearing_Necklace    | Attractive               | 0.381 |
| Bushy_Eyebrows      | Black_Hair               | 0.381 |
| Double_Chin         | Eyeglasses               | 0.384 |
| Rosy_Cheeks         | Wearing_Earrings         | 0.386 |
| Big_Lips            | Arched_Eyebrows          | 0.386 |
| Wavy_Hair           | Arched_Eyebrows          | 0.386 |
| Big_Nose            | Receding_Hairline        | 0.391 |
| Gray_Hair           | Eyeglasses               | 0.391 |
| Heavy_Makeup        | No_Beard                 | 0.393 |
| Black_Hair          | Young                    | 0.394 |
| Pointy_Nose         | Wearing_Lipstick         | 0.396 |
| Five_Clk_Shdw       | Goatee                   | 0.396 |
| Pale_Skin           | Attractive               | 0.397 |
| fairface_east_asian | fairface_southeast_asian | 0.398 |
| Heavy_Makeup        | Pointy_Nose              | 0.400 |
| Mustache            | Big_Nose                 | 0.400 |
| fairface_70+        | Gray_Hair                | 0.401 |
| fairface_male       | Big_Nose                 | 0.407 |
| Attractive          | Oval_Face                | 0.408 |
| fairface_60-69      | Bald                     | 0.409 |
| Big_Nose            | FA_gender                | 0.409 |
| Wearing_Necklace    | No_Beard                 | 0.411 |
| Big_Nose            | FA_age                   | 0.411 |
| Chubby              | fairface_60-69           | 0.411 |
| Young               | fairface_10-19           | 0.413 |
| Wearing_Necklace    | Blond_Hair               | 0.414 |
| FA_age              | Bags_Under_Eyes          | 0.414 |
| Heavy_Makeup        | Big_Lips                 | 0.417 |
| Heavy_Makeup        | Wavy_Hair                | 0.420 |
| Goatee              | FA_gender                | 0.420 |

Continued on next column/page...



Table 1: Attribute Correlation Coefficients (Continued)

| Attribute Pair    |                   | $p$   |
|-------------------|-------------------|-------|
| Sideburns         | FA_gender         | 0.420 |
| Brown_Hair        | Wavy_Hair         | 0.421 |
| Bald              | Big_Nose          | 0.422 |
| Big_Lips          | Wearing_Necklace  | 0.422 |
| Chubby            | Bags_Under_Eyes   | 0.424 |
| fairface_female   | Wavy_Hair         | 0.425 |
| FA_gender         | Chubby            | 0.426 |
| FA_age            | Bald              | 0.426 |
| fairface_male     | Chubby            | 0.429 |
| nima              | pzq2piq           | 0.432 |
| Wearing_Necklace  | Bangs             | 0.432 |
| Wearing_Earrings  | No_Beard          | 0.435 |
| Big_Lips          | Wearing_Lipstick  | 0.437 |
| Oval_Face         | Smiling           | 0.438 |
| fairface_male     | Sideburns         | 0.440 |
| Goatee            | fairface_male     | 0.440 |
| Gray_Hair         | Big_Nose          | 0.441 |
| Eyeglasses        | Wearing_Necktie   | 0.443 |
| Chubby            | Male              | 0.445 |
| brisque           | Blurry            | 0.446 |
| Big_Nose          | Male              | 0.451 |
| Male              | Sideburns         | 0.456 |
| Sideburns         | Five_Clk_Shdw     | 0.460 |
| Wearing_Lipstick  | No_Beard          | 0.461 |
| Goatee            | Male              | 0.461 |
| Double_Chin       | fairface_60-69    | 0.462 |
| Receding_Hairline | Double_Chin       | 0.462 |
| fairface_50-59    | Chubby            | 0.464 |
| Wearing_Necktie   | Receding_Hairline | 0.464 |
| Chubby            | Mustache          | 0.467 |
| Wearing_Lipstick  | Wavy_Hair         | 0.468 |
| FA_gender         | Mustache          | 0.470 |
| Wearing_Necktie   | Bags_Under_Eyes   | 0.474 |
| Wavy_Hair         | Wearing_Necklace  | 0.474 |
| Rosy_Cheeks       | Wearing_Lipstick  | 0.475 |

Continued on next column/page...

Table 1: Attribute Correlation Coefficients (Continued)

| Attribute Pair      |                   | $p$   |
|---------------------|-------------------|-------|
| Gray_Hair           | Bags_Under_Eyes   | 0.476 |
| FA_age              | fairface_70+      | 0.476 |
| Big_Lips            | fairface_black    | 0.479 |
| Chubby              | Receding_Hairline | 0.483 |
| fairface_male       | Mustache          | 0.488 |
| Gray_Hair           | Receding_Hairline | 0.489 |
| fairface_female     | Attractive        | 0.490 |
| Rosy_Cheeks         | Wearing_Necklace  | 0.493 |
| FA_gender           | Wearing_Necktie   | 0.495 |
| High_Cheekbones     | Oval_Face         | 0.496 |
| fairface_20-29      | Attractive        | 0.496 |
| fairface_50-59      | fairface_60-69    | 0.497 |
| fairface_male       | Wearing_Necktie   | 0.500 |
| FA_age              | Chubby            | 0.503 |
| Bags_Under_Eyes     | Double_Chin       | 0.510 |
| Heavy_Makeup        | Rosy_Cheeks       | 0.511 |
| Male                | Mustache          | 0.512 |
| Five_Clk_Shdw       | FA_gender         | 0.514 |
| fairface_50-59      | Double_Chin       | 0.515 |
| Big_Nose            | Wearing_Necktie   | 0.517 |
| Bald                | Double_Chin       | 0.524 |
| pzq2piq             | MagFace           | 0.528 |
| fairface_60-69      | Wearing_Necktie   | 0.534 |
| Male                | Wearing_Necktie   | 0.534 |
| Five_Clk_Shdw       | fairface_male     | 0.537 |
| Gray_Hair           | Chubby            | 0.540 |
| fairface_50-59      | Wearing_Necktie   | 0.545 |
| Bald                | Chubby            | 0.551 |
| Wearing_Necklace    | Arched_Eyebrows   | 0.555 |
| Mouth_Slightly_Open | High_Cheekbones   | 0.556 |
| FA_age              | Wearing_Necktie   | 0.561 |
| Attractive          | Arched_Eyebrows   | 0.566 |
| FA_age              | Double_Chin       | 0.571 |
| Attractive          | Young             | 0.572 |
| Arched_Eyebrows     | fairface_female   | 0.573 |

Continued on next column/page...

Table 1: Attribute Correlation Coefficients (Continued)

| Attribute Pair      |                  | $p$   |
|---------------------|------------------|-------|
| fairface_60-69      | fairface_70+     | 0.575 |
| Five_Clk_Shdw       | Male             | 0.579 |
| pzq2piq             | sdd-fiq          | 0.584 |
| Bald                | Gray_Hair        | 0.588 |
| Bald                | Wearing_Necktie  | 0.599 |
| No_Beard            | fairface_female  | 0.602 |
| Wearing_Earrings    | Arched_Eyebrows  | 0.604 |
| Heavy_Makeup        | fairface_female  | 0.605 |
| Heavy_Makeup        | Wearing_Earrings | 0.610 |
| Gray_Hair           | Double_Chin      | 0.611 |
| Heavy_Makeup        | Wearing_Necklace | 0.611 |
| fairface_50-59      | FA_age           | 0.613 |
| Mouth_Slightly_Open | Smiling          | 0.632 |
| fairface_50-59      | Gray_Hair        | 0.642 |
| fairface_60-69      | Gray_Hair        | 0.642 |
| fairface_female     | Wearing_Earrings | 0.644 |
| fairface_female     | Wearing_Necklace | 0.647 |
| fairface_60-69      | FA_age           | 0.656 |
| Gray_Hair           | FA_age           | 0.656 |
| Wearing_Earrings    | Wearing_Lipstick | 0.659 |
| Big_Nose            | Bags_Under_Eyes  | 0.660 |
| Chubby              | Wearing_Necktie  | 0.671 |
| Double_Chin         | Wearing_Necktie  | 0.678 |
| Wearing_Necklace    | Wearing_Lipstick | 0.678 |
| Receding_Hairline   | Bald             | 0.685 |
| Heavy_Makeup        | Attractive       | 0.695 |
| fairface_female     | Wearing_Lipstick | 0.697 |
| Young               | fairface_20-29   | 0.705 |
| Arched_Eyebrows     | Heavy_Makeup     | 0.715 |
| Attractive          | Wearing_Lipstick | 0.718 |
| Gray_Hair           | Wearing_Necktie  | 0.719 |
| Wearing_Earrings    | Wearing_Necklace | 0.728 |
| Double_Chin         | Big_Nose         | 0.730 |
| Chubby              | Big_Nose         | 0.735 |
| Wearing_Lipstick    | Arched_Eyebrows  | 0.750 |

Continued on next column/page...

Table 1: Attribute Correlation Coefficients (Continued)

| Attribute Pair  |                  | $p$   |
|-----------------|------------------|-------|
| sdd-fiq         | MagFace          | 0.822 |
| High_Cheekbones | Smiling          | 0.830 |
| Mustache        | Sideburns        | 0.864 |
| FA_gender       | Male             | 0.870 |
| Double_Chin     | Chubby           | 0.872 |
| fairface_male   | Male             | 0.898 |
| fairface_male   | FA_gender        | 0.905 |
| Goatee          | Mustache         | 0.929 |
| Heavy_Makeup    | Wearing_Lipstick | 0.934 |
| Sideburns       | Goatee           | 0.944 |
